# Supplementary material for: Efficient Expression of Xylanase by Codon Optimization and Its Effects on the Growth Performance and Carcass Characteristics of Broiler
Source: MDPI journal article supplement (doi:10.3390/ani9020065), 2019-02-20
Supplement: s1 [file s1]

# Supplementary Materials: Efficient Expression of Xylanase by Codon Optimization and Its Effects on the Growth Performance and Carcass Characteristics of Broiler

Hong Hu †, Sifa Dai †, Aiyou Wen and Xi Bai \*

College of Animal Science, Anhui Science and Technology University, Fengyang, 233100, China; haiyanghh@163.com (H.H.); daisifa-004@163.com (S.D.); aywen2008@126.com (A.W.)

\* Correspondence: baixi1987326@163.com; Tel.: +86-0550-6732040

† These authors contributed equally to the experimentations.

Received: 13 January 2019; Accepted: 16 February 2019; Published

**Supplementary Table 1.** Ingredient and composition of basal diets (g/kg).

|                                      | Starter diet (1–21 d) | Grower diet (22–42 d) |
|--------------------------------------|-----------------------|-----------------------|
| <b>Dietary ingredients (g/kg)</b>    |                       |                       |
| Ground yellow maize                  | 514.1                 | 566.5                 |
| Maize starch                         | 10.0                  | 10.0                  |
| Soybean meal                         | 386.5                 | 341.0                 |
| Fish meal                            | 35.0                  | 20.0                  |
| Soybean oil                          | 30.0                  | 35.0                  |
| Dicalcium phosphate                  | 9.5                   | 11.0                  |
| Ground limestone                     | 9.0                   | 10.5                  |
| Iodized salt                         | 3.0                   | 3.0                   |
| DL-Methionine                        | 0.9                   | 1.0                   |
| Micronutrients <sup>a</sup>          | 2.0                   | 2.0                   |
| <b>Composition calculated (g/kg)</b> |                       |                       |
| AME (MJ/kg)                          | 11.35                 | 12.46                 |
| Lysine                               | 12.5                  | 11.4                  |
| Methionine                           | 4.8                   | 4.3                   |
| Methionine + cystine                 | 8.4                   | 7.6                   |
| Non-phytate phosphorus               | 4.2                   | 3.7                   |
| <b>Analyzed (g/kg)</b>               |                       |                       |
| Crude protein                        | 231.2                 | 204.7                 |
| Calcium <sup>c</sup>                 | 10.3                  | 8.8                   |

<sup>a</sup> Provided per kilogram of diet: vitamin A (as all-*trans* retinol acetate), 10,000 IU; cholecalciferol, 2600 IU; vitamin B<sub>6</sub>, 3.0 mg; vitamin B<sub>12</sub>, 0.014 mg; thiamin (as thiamin mononitrate), 1.6 mg; vitamin E (as all-*rac*- $\alpha$ -tocopherol acetate), 20 IU; vitamin K (as menadione sodium bisulfate), 2.0 mg; riboflavin, 6.0 mg; calcium pantothenate, 20 mg; niacin, 30 mg; folic acid, 0.8 mg; biotin, 0.12 mg; choline (as choline chloride), 500 mg; iron (from iron sulfate), 80 mg; iodine (from potassium iodide), 0.35 mg; selenium (from sodium selenite), 0.15 mg; zinc (from zinc sulfate), 40 mg; copper (from copper sulfate), 8 mg.
